# Supplementary material
Source: HighWire-hosted journal article supplement (http://www.ajnr.org/highwire/filestream/52468/field_highwire_adjunct_files/0/3681_table.pdf)
Supplement: 3681_table.pdf [file 3681_table.pdf]

**On-line Table: Summary of patients with V1 segment occlusion**

| Patient No. | Sex/Age | Onset | NIHSS <sub>o</sub> | DWI Lesion Sites    | No. of Lesions | Maximal Lesion Size (mm) | Occlusion Sites | Stenting Sites | Type of Stent                       | Protection Device           | mRS at 3 mo | Image FU                     |
|-------------|---------|-------|--------------------|---------------------|----------------|--------------------------|-----------------|----------------|-------------------------------------|-----------------------------|-------------|------------------------------|
| 1           | M/67    | 5 h   | 9                  | BS, cbl             | 2              | 15                       | V1, BA          | V1, BA         | Precise (5/30)/Neuroform (4/30)     | NA                          | 1           | Good patency on 2 y 6 mo CTA |
| 2           | F/66    | 1 d   | 17                 | BS, cbl, thalami    | 5              | 16                       | V1, BA          | V1, BA         | Acculink (5/30)/Enterprise (4.5/28) | NA                          | 5           | ND                           |
| 3           | M/54    | 12 d  | 5                  | BS, cbl             | 12             | 18                       | V1              | V1             | Precise (5/30)                      | Spider                      | 2           | ND                           |
| 4           | M/75    | 7 d   | 5                  | BS, cbl             | 7              | 10                       | V1              | V1             | Precise (5/40)                      | Distal balloon <sup>a</sup> | 0           | ND                           |
| 5           | M/55    | 2 mo  | 0                  | Cbl                 | 3              | 19                       | V1              | V1             | Precise (5/40)                      | Distal balloon <sup>a</sup> | 0           | Good patency on 10 mo DUS    |
| 6           | M/61    | 8 h   | 0                  | BS, cbl             | 2              | 7                        | V1              | V1             | Precise (5/40)                      | Proximal balloon            | 0           | 40% stenosis on 5 mo CTA     |
| 7           | M/69    | 2 mo  | 2                  | cbl                 | 1              | 10                       | V1              | Aborted        | —                                   | NA                          | 1           | ND                           |
| 8           | M/70    | 5 d   | 4                  | cbl, occipital lobe | 2              | 15                       | V1              | V1             | Precise (5/40)                      | Distal balloon <sup>a</sup> | 0           | Good patency on 4 mo DUS     |

**Note:**—BA indicates basilar artery; BS, brain stem; cbl, cerebellum; d, day(s); DUS, Doppler ultrasonography; F, female; FU, follow-up; h, hours; M, male; mo, months; NA, not applied; ND, not done; NIHSS<sub>o</sub>, National Institutes of Health Stroke Scale on admission; y, years.

<sup>a</sup> PercuSurge was used.
